# Supplementary material for: Ovariectomy reduces cholinergic modulation of excitatory synaptic transmission in the rat entorhinal cortex
Source: PubMed Central journal article supplement (PMC9359571; doi:10.1371/journal.pone.0271131), 2022-08-08

Acetylcholinesterase (AChE) and  $\beta$ -Actin Loading Control (all samples loaded in gels (n=6))

Figure 1A<sub>1</sub>

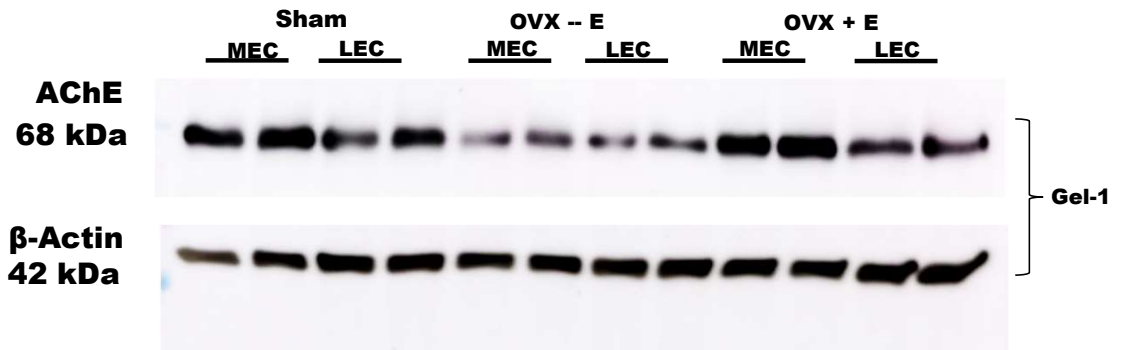

X

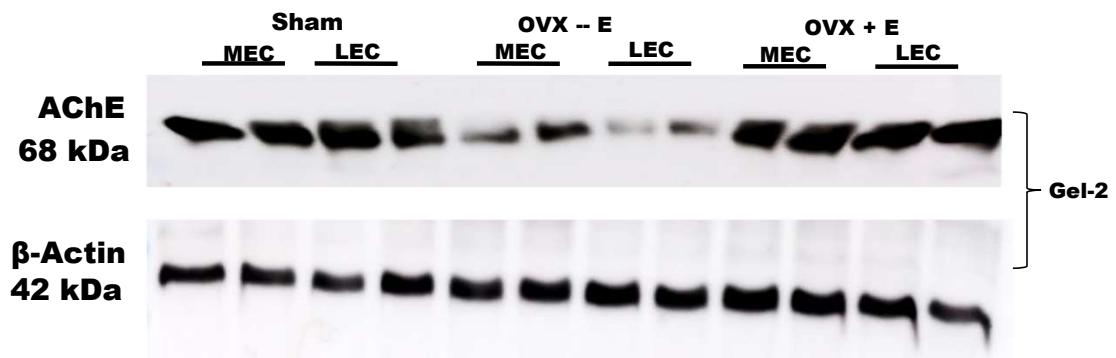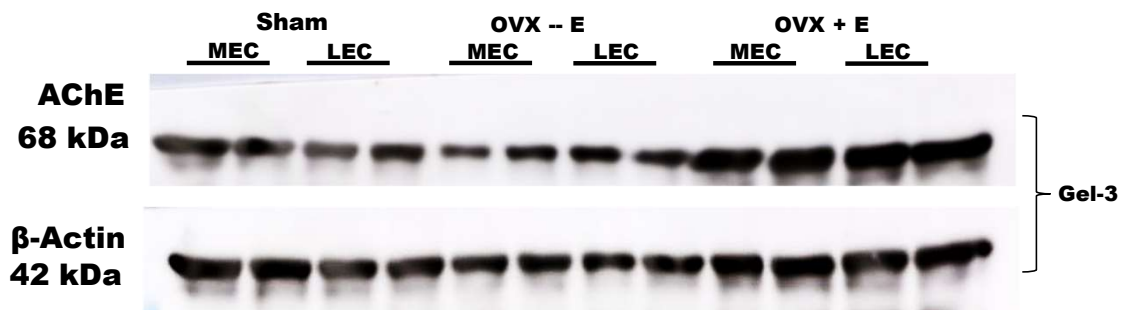

**Vesicular acetylcholine transporter (VACHT) and Vinculin Loading Control (all samples loaded in gels (n=6))**

**Figure 1B<sub>1</sub>**

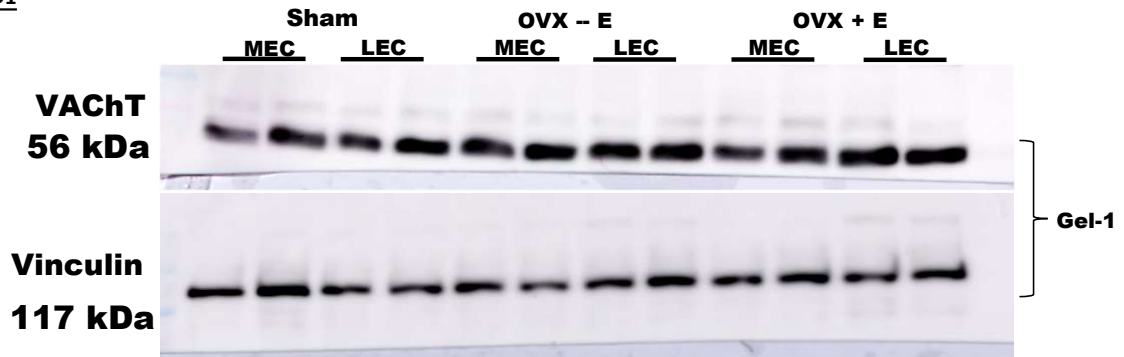

**X**

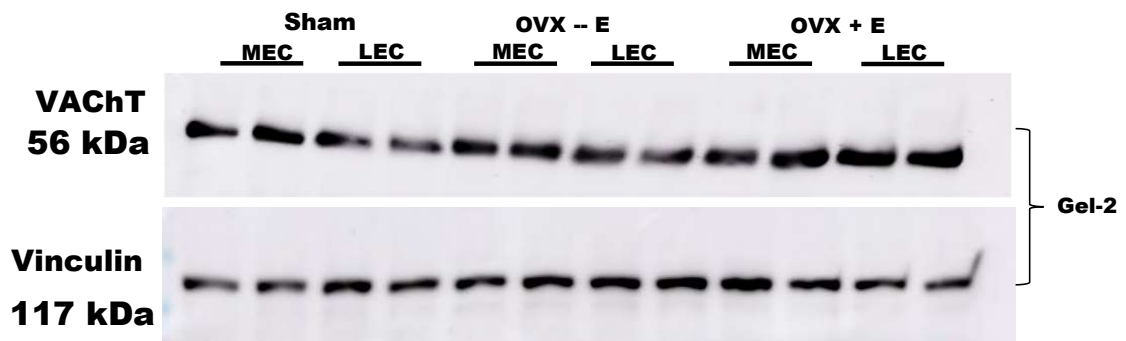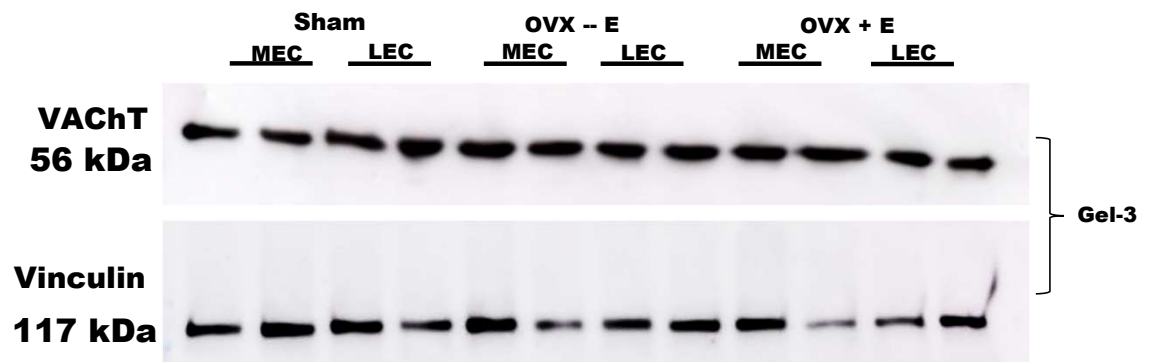

Muscarinic acetylcholine receptor (M1) and  $\beta$ -Actin Loading Control (all samples loaded in gels (n=6))

Figure 1C1

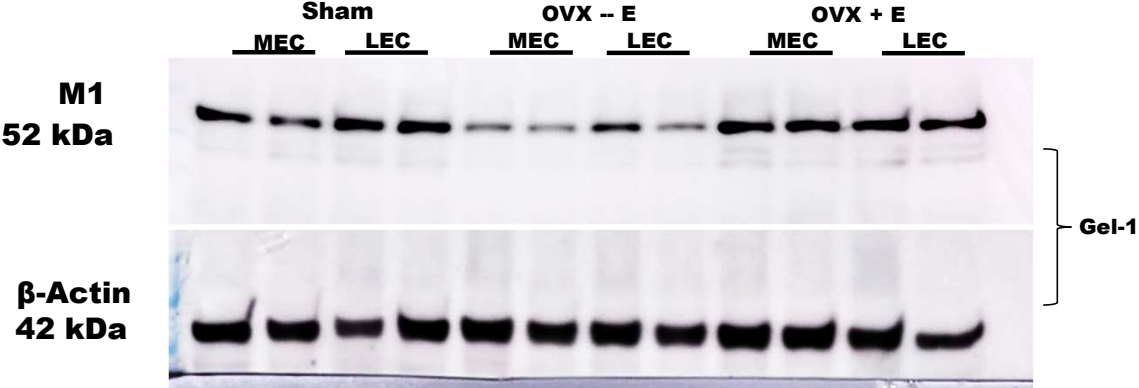

X

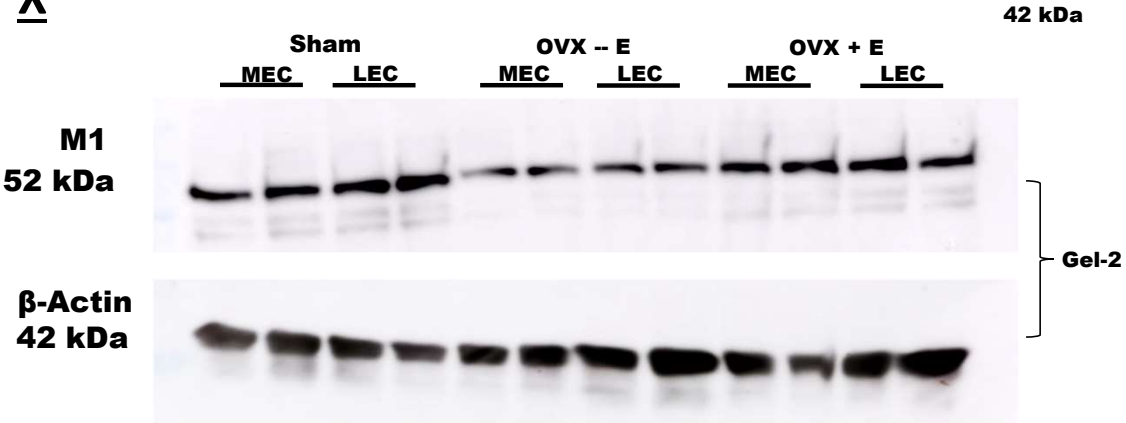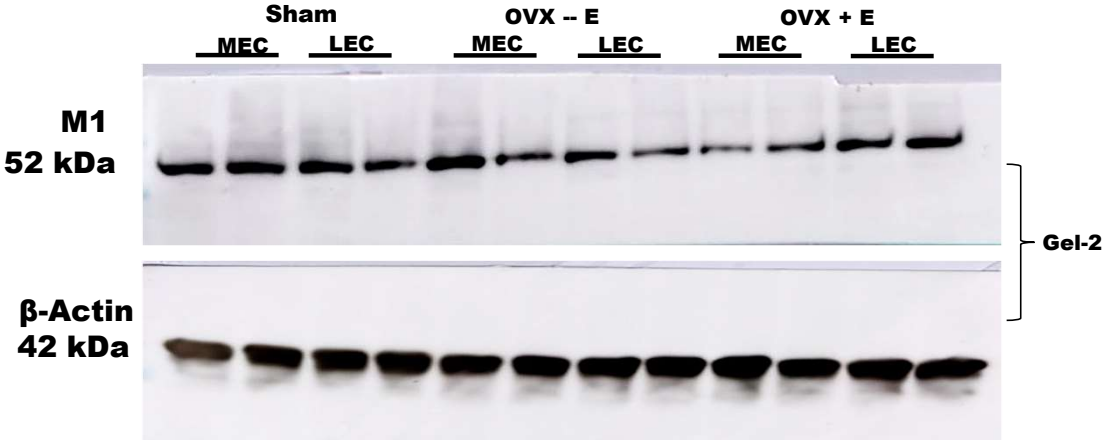

Supplement: pone.0271131.s001.pdf [file pone.0271131.s001.pdf]
